# Supplementary material for: General chelating action of copper, zinc and iron in mammalian cells
Source: Royal Society of Chemistry journal article supplement (doi:10.1039/c4ay01912a), 2014-01-01
Supplement: c4ay01912a2.pdf [file c4ay01912a2.pdf]

Supplementary material: Table S1, S2, S3, S4 and S5

**Table S1. Analytical features of some procedures using SS GF AAS to determine Cu, Fe and Zn.**

| Metal | Sample                               | Linear range                 | LOD ( $\mu\text{g g}^{-1}$ ) | Ref.      |
|-------|--------------------------------------|------------------------------|------------------------------|-----------|
| Cu    | Mammalian cells                      | 0.05 – 0.75 ng               | 0.048                        | This work |
| Fe    | Mammalian cells                      | 0.05 – 0.50 ng               | 0.024                        | This work |
| Zn    | Mammalian cells                      | 0.04 – 0.16 ng               | 0.0069                       | This work |
| Zn    | Agriculture soil and vitamin complex | 5-300 ng                     | 4.1                          | 39        |
| Zn    | Rice                                 | 1.75 – 2.25 mg               | Down to 10                   | 38        |
| Fe    | Rice                                 | 0.75 – 2.25 mg               | Down to 10                   | 38        |
| Zn    | Nuts                                 | 1 – 4 $\mu\text{g L}^{-1}$   | 0.001                        | 41        |
| Fe    | Nuts                                 | 10 – 40 $\mu\text{g L}^{-1}$ | 0.0014                       | 41        |
| Cu    | Nuts                                 | 20 – 80 $\mu\text{g L}^{-1}$ | 0.00072                      | 41        |

**TABLE S2. Concentrations of Cu, Fe and Zn in U937 cells with the developed SS GF AAS method used in this work.**

| Chelant Type | Chelant Concentration (mM) | Time (h) | Copper (ng/mg) | Iron (ng/mg) | Zinc (ng/mg) |
|--------------|----------------------------|----------|----------------|--------------|--------------|
| DedTC        | 5                          | 24       | 48.004         | 19.66022     | 145.6140     |
|              |                            |          | 48.731         | 19.00809     | 157.3480     |
|              |                            |          | 48.906         | 19.18155     | 138.3704     |
| DedTC        | 5                          | 48       | 21.447         | 18.65207     | 120.6512     |
|              |                            |          | 18.987         | 17.72051     | 117.2002     |
|              |                            |          | 20.702         | 20.11330     | 116.6188     |
| DedTC        | 50                         | 24       | 49.438         | 18.94730     | 143.0484     |
|              |                            |          | 50.845         | 18.86708     | 154.6436     |
|              |                            |          | 47.699         | 18.17197     | 145.5718     |
| DedTC        | 50                         | 48       | 25.294         | 21.03369     | 113.0637     |
|              |                            |          | 24.362         | 23.88148     | 109.2846     |
|              |                            |          | 26.286         | 19.08348     | 112.9599     |
| Trien        | 5                          | 24       | 1.965          | 22.81356     | 89.3202      |
|              |                            |          | 2.091          | 23.61021     | 83.6739      |
|              |                            |          | 2.092          | 23.06843     | 84.5169      |
| Trien        | 5                          | 48       | 3.936          | 20.58576     | 87.8342      |

|         |    |    |       |          |         |
|---------|----|----|-------|----------|---------|
|         |    |    | 5.248 | 17.46327 | 88.9655 |
|         |    |    | 5.734 | 19.59250 | 83.5146 |
| Trien   | 50 | 24 | 0.432 | 28.47677 | 81.1688 |
|         |    |    | 0.524 | 35.73231 | 80.4656 |
|         |    |    | ---   | 30.95413 | 78.2286 |
| Trien   | 50 | 48 | 0.947 | 18.47174 | 87.5913 |
|         |    |    | 1.033 | 19.68670 | 88.4518 |
|         |    |    | 0.904 | 22.27200 | 84.7400 |
| TPEN    | 5  | 24 | 1.262 | 14.91566 | 82.5761 |
|         |    |    | 1.010 | 14.42919 | 80.0973 |
|         |    |    | 1.351 | 17.60279 | 83.2892 |
| TPEN    | 5  | 48 | 0.237 | 23.98368 | 91.6305 |
|         |    |    | 3.052 | 22.55148 | 91.3816 |
|         |    |    | 1.782 | 20.15984 | 91.3178 |
| TPEN    | 5  | 24 | 0.0   | 77.57174 | 24.3602 |
|         |    |    | 0.0   | 71.77376 | 25.4247 |
|         |    |    | 0.0   | 78.57917 | 23.3209 |
| TPEN    | 5  | 48 | 0.0   | 57.79083 | 7.5040  |
|         |    |    | 0.0   | 63.91309 | 5.0645  |
|         |    |    | 0.0   | 64.83759 | 6.4349  |
| Control |    | 24 | 2.624 | 20.80696 | 80.6986 |
|         |    |    | 2.990 | 23.29813 | 77.2253 |
|         |    |    | 2.300 | 19.14557 | 75.8423 |
| Control |    | 48 | 5.381 | 21.65326 | 81.5965 |
|         |    |    | 4.768 | 17.17902 | 82.4288 |
|         |    |    | 4.993 | 22.72796 | 92.2379 |
|         |    |    | 4.666 | 21.20926 | 77.3588 |

**Table S3. Analysis of Variance for the Copper Cubic Model**

| Source of Variation | Sum of Squares | Degrees of Freedom | Mean Square |
|---------------------|----------------|--------------------|-------------|
| Regression          | 11473.478      | 10                 | 1147.348    |
| Residual            | 24.690         | 24                 | 1.029       |
| Adjust Error        | 8.440          | 1                  | 8.440       |
| Pure Error          | 16.250         | 23                 | 0.707       |
| Total               | 11498.168      | 34                 |             |

% of the explained variation: 99.79

% of the maximum explained variation: 99.86

$MS_{REG}/MS_{RES}=1115, F_{10,24}=2.25$

$MS_{ADJ}/MS_{PURE}=11.94, F_{1,23}=4.28$

**Table S4. Analysis of Variance for the Iron Cubic Model**

| Source of Variation | Sum of Squares | Degrees of Freedom | Mean Square |
|---------------------|----------------|--------------------|-------------|
| Regression          | 12331.975      | 10                 | 1233.198    |
| Residual            | 125.423        | 25                 | 5.017       |
| Adjust Error        | 0.498          | 1                  | 0.498       |
| Pure Error          | 124.925        | 24                 | 5.205       |
| Total               | 12457.398      | 35                 |             |

% of the explained variation: 98.99

% of the maximum explained variation: 99.00

$MS_{REG}/MS_{RES}=245, F_{10,25}=2.24$

$MS_{ADJ}/MS_{PURE}=0.0957, F_{1,24}=4.26$

**Table S5. Analysis of Variance for the Zinc Cubic Model**

| Source of Variation | Sum of Squares | Degrees of Freedom | Mean Square |
|---------------------|----------------|--------------------|-------------|
| Regression          | 57822.238      | 10                 | 5782.224    |
| Residual            | 606.248        | 25                 | 24.250      |
| Adjust Error        | 271.432        | 1                  | 271.432     |
| Pure Error          | 334.816        | 24                 | 13.951      |
| Total               | 58428.486      | 35                 |             |

% of the explained variation: 98.96

% of the maximum explained variation: 99.43

$MS_{REG}/MS_{RES}=238, F_{10,25}=2.24$

$MS_{ADJ}/MS_{PURE}=19.46, F_{1,24}=4.26$
